# Supplementary material
Source: MDPI journal article supplement (https://www.mdpi.com/2076-0760/13/3/166)
Supplement: s1 [file s1]

# Supplementary Materials

**Table S1.** OLS Regression of Fathers' Change in Childcare During COVID-19 Pandemic.

| Variable                                                                 | <i>Dual-Earner Father</i><br>( <i>N</i> = 191) |                           | <i>Sole Earner Father</i><br>( <i>N</i> = 146) |                           |
|--------------------------------------------------------------------------|------------------------------------------------|---------------------------|------------------------------------------------|---------------------------|
|                                                                          | <i>Model 1</i>                                 | <i>Model 2</i>            | <i>Model 3</i>                                 | <i>Model 4</i>            |
|                                                                          | <i>b</i><br>( <i>se</i> )                      | <i>b</i><br>( <i>se</i> ) | <i>b</i><br>( <i>se</i> )                      | <i>b</i><br>( <i>se</i> ) |
| Father's frequency of remote work                                        | .054*<br>(.024)                                | .055*<br>(.024)           | .051<br>(.028)                                 | .052<br>(.028)            |
| Father's egalitarian gender ideology                                     | .060<br>(.064)                                 | .042<br>(.063)            | -.098<br>(.082)                                | -.093<br>(.084)           |
| Fathers' frequency of remote work X Fathers' egalitarian gender ideology |                                                | .088*<br>(.034)           |                                                | .011<br>(.035)            |
| <i>Statistical Controls</i>                                              |                                                |                           |                                                |                           |
| Father's frequency of remote work pre-pandemic                           | -.072**<br>(.024)                              | -.074**<br>(.024)         | .002<br>(.038)                                 | .004<br>(.039)            |
| Father's share of childcare pre-pandemic                                 | -.325**<br>(.098)                              | -.325**<br>(.097)         | -.120<br>(.091)                                | -.122<br>(.091)           |
| Used childcare prior to pandemic                                         |                                                |                           | -.049<br>(.145)                                | -.053<br>(.146)           |
| <i>Partner's Work Status</i>                                             |                                                |                           |                                                |                           |
| Partner's paid work hours                                                | .001<br>(.004)                                 | .000<br>(.004)            | ---                                            | ---                       |
| Partner does not work from home                                          | .079<br>(.100)                                 | .055<br>(.098)            | ---                                            | ---                       |
| Partner voluntarily decreased paid work hours                            | .162<br>(.124)                                 | .157<br>(.122)            | ---                                            | ---                       |
| Partner left job voluntarily                                             | ---                                            | ---                       | .120<br>(.210)                                 | .104<br>(.217)            |
| Partner lost job involuntarily                                           | ---                                            | ---                       | -.140<br>(.145)                                | -.138<br>(.146)           |
| Father's age                                                             | -.013<br>(.011)                                | -.016<br>(.011)           | -.024*<br>(.011)                               | -.024*<br>(.011)          |
| Partner's age                                                            | .002<br>(.012)                                 | .004<br>(.012)            | .016<br>(.016)                                 | .015<br>(.016)            |
| Age of youngest child                                                    | .007<br>(.013)                                 | .007<br>(.012)            | .029<br>(.017)                                 | .029<br>(.018)            |
| Number of children in home                                               | .022<br>(.054)                                 | .015<br>(.053)            | -.070<br>(.068)                                | -.066<br>(.070)           |
| Married                                                                  | .274<br>(.170)                                 | .264<br>(.167)            | -.094<br>(.273)                                | -.101<br>(.275)           |
| Household income pre-pandemic                                            | -.001<br>(.035)                                | -.001<br>(.034)           | .057<br>(.038)                                 | .056<br>(.038)            |
| <i>Father's Race</i>                                                     |                                                |                           |                                                |                           |
| Black                                                                    | -.013<br>(.289)                                | .109<br>(.288)            | .316<br>(.487)                                 | .326<br>(.490)            |
| Other                                                                    | -.144<br>(1.63)                                | -.105<br>(.161)           | .088<br>(.274)                                 | .084<br>(.276)            |
| Hispanic/Latino                                                          | -.028<br>(.153)                                | -.099<br>(.153)           | -.204<br>(.219)                                | -.197<br>(.221)           |
| <i>Partner's Race</i>                                                    |                                                |                           |                                                |                           |

|                                  |                   |                   |                 |                 |
|----------------------------------|-------------------|-------------------|-----------------|-----------------|
| Black                            | -.034<br>(.337)   | -.165<br>(.335)   | -.312<br>(.577) | -.320<br>(.580) |
| Other                            | .187<br>(.153)    | .347<br>(.161)    | .074<br>(.207)  | .080<br>(.209)  |
| Hispanic/Latina                  | .274<br>(.161)    | .347*<br>(.161)   | -.218<br>(.251) | -.229<br>(.254) |
| <i>Father's Education Level</i>  |                   |                   |                 |                 |
| Associate's Degree               | -.080<br>(.174)   | -.101<br>(.171)   | .149<br>(.284)  | .140<br>(.287)  |
| Bachelor's Degree or Higher      | .078<br>(.139)    | .003<br>(.140)    | .036<br>(.174)  | .023<br>(.180)  |
| <i>Partner's Education Level</i> |                   |                   |                 |                 |
| Associate's Degree               | .019<br>(.170)    | .043<br>(.168)    | -.071<br>(.182) | -.061<br>(.185) |
| Bachelor's Degree or Higher      | -.062<br>(.136)   | -.022<br>(.135)   | .030<br>(.127)  | .034<br>(.128)  |
| Constant                         | 1.087**<br>(.401) | 1.165**<br>(.395) | .818<br>(.506)  | .839<br>(.512)  |
| R <sup>2</sup>                   | .126              | .155              | .079            | .072            |

---

**Table S2.** Binary Logistic Regression of Fathers' Odds of Doing More Childcare During COVID-19 Pandemic.

| Variable                                                                       | <i>Dual-Earner Father</i><br>( <i>N</i> = 191) |           |                           |           | <i>Sole Earner Father</i><br>( <i>N</i> = 146) |           |                           |           |
|--------------------------------------------------------------------------------|------------------------------------------------|-----------|---------------------------|-----------|------------------------------------------------|-----------|---------------------------|-----------|
|                                                                                | <i>Model 1</i>                                 |           | <i>Model 2</i>            |           | <i>Model 3</i>                                 |           | <i>Model 4</i>            |           |
|                                                                                | <i>b</i><br>( <i>se</i> )                      | <i>OR</i> | <i>b</i><br>( <i>se</i> ) | <i>OR</i> | <i>b</i><br>( <i>se</i> )                      | <i>OR</i> | <i>b</i><br>( <i>se</i> ) | <i>OR</i> |
| Fathers' frequency of remote work                                              | .219<br>(.116)                                 | 1.245     | .326*<br>(.147)           | 1.385     | .333**<br>(.116)                               | 1.395     | .331**<br>(.118)          | 1.393     |
| Fathers' egalitarian gender ideology                                           | -.025<br>(.307)                                | .975      | -.372<br>(.366)           | .689      | -.154<br>(.332)                                | .858      | -.154<br>(.332)           | .857      |
| Fathers' frequency of remote work<br>X Fathers' egalitarian gender<br>ideology |                                                |           | .650**<br>(.242)          | 1.916     |                                                |           | -.013<br>(.149)           | .987      |
| <i>Statistical Controls</i>                                                    |                                                |           |                           |           |                                                |           |                           |           |
| Fathers' frequency of remote work<br>pre-pandemic                              | -.320**<br>(.119)                              | .726      | -.327**<br>(.119)         | .721      | -.007<br>(.142)                                | .993      | -.008<br>(.143)           | .992      |
| Fathers' share of childcare pre-<br>pandemic                                   | -1.316*<br>(.516)                              | .268      | -1.308*<br>(.535)         | .270      | -.527<br>(.359)                                | .590      | -.526<br>(.360)           | .591      |
| Use of childcare pre-pandemic                                                  | -.029<br>(.481)                                | .971      | -0.060<br>(.500)          | .942      | .522<br>(.568)                                 | 1.685     | .524<br>(.569)            | 1.689     |
| <i>Partner's Work Status</i>                                                   |                                                |           |                           |           |                                                |           |                           |           |
| Partner's paid work hours                                                      | .017<br>(.021)                                 | 1.017     | .016<br>(.021)            | 1.016     | ---                                            | ---       | ---                       | ---       |
| Partner does not work from home                                                | -.474<br>(.488)                                | .622      | -.699<br>(.519)           | .497      | ---                                            | ---       | ---                       | ---       |
| Partner voluntarily decreased paid<br>work hours                               | .777<br>(.576)                                 | 2.175     | .751<br>(.592)            | 2.118     | ---                                            | ---       | ---                       | ---       |
| Partner left job voluntarily                                                   | ---                                            | ---       | ---                       | ---       | -.249<br>(.817)                                | .780      | -.233<br>(.838)           | .792      |
| Partner lost job involuntarily                                                 | ---                                            | ---       | ---                       | ---       | -.421<br>(.586)                                | .656      | -.421<br>(.586)           | .657      |
| Father's age                                                                   | -.025<br>(.052)                                | .976      | -.036<br>(.054)           | .965      | -.074<br>(.046)                                | .928      | -.075<br>(.046)           | .928      |
| Partner's age                                                                  | -.069<br>(.058)                                | .933      | -.055<br>(.059)           | .946      | .054<br>(.065)                                 | 1.055     | .054<br>(.066)            | 1.056     |
| Age of youngest child                                                          | .035<br>(.060)                                 | 1.036     | .035<br>(.061)            | 1.035     | .090<br>(.071)                                 | 1.094     | .090<br>(.071)            | 1.094     |
| Number of children in home                                                     | .159<br>(.262)                                 | 1.172     | .156<br>(.273)            | 1.169     | -.453<br>(.275)                                | .636      | -.458<br>(.281)           | .633      |
| Married                                                                        | .873<br>(.933)                                 | 2.394     | .866<br>(.949)            | 2.377     | -.803<br>(1.114)                               | .448      | -.791<br>(1.121)          | .453      |
| Household income pre-pandemic                                                  | .052<br>(.168)                                 | 1.053     | .050<br>(.177)            | 1.051     | .164<br>(.147)                                 | 1.178     | .165<br>(.147)            | 1.179     |
| <i>Father's Race</i>                                                           |                                                |           |                           |           |                                                |           |                           |           |
| Black <sup>a</sup>                                                             | .031<br>(1.262)                                | 1.031     | .679<br>(1.367)           | 1.971     | ---                                            | ---       | ---                       | ---       |
| Other                                                                          | .446<br>(.802)                                 | 1.563     | .527<br>(.814)            | 1.694     | 1.540<br>(1.289)                               | 4.664     | 1.539<br>(1.288)          | 4.660     |
| Hispanic/Latino                                                                | .267<br>(.706)                                 | 1.307     | .013<br>(.767)            | 1.013     | .128<br>(.859)                                 | 1.137     | .120<br>(.865)            | 1.128     |
| <i>Partner's Race</i>                                                          |                                                |           |                           |           |                                                |           |                           |           |
| Black                                                                          | -.149<br>(1.475)                               | .861      | -.705<br>(1.582)          | .494      | 1.035<br>(1.172)                               | 2.816     | 1.034<br>(1.172)          | 2.811     |

|                                  |                   |       |                   |       |                  |       |                  |       |
|----------------------------------|-------------------|-------|-------------------|-------|------------------|-------|------------------|-------|
| Other                            | .346<br>(.716)    | 1.414 | .507<br>(.749)    | 1.660 | .457<br>(.813)   | 1.579 | .451<br>(.816)   | 1.569 |
| Hispanic/Latina                  | .917<br>(.840)    | 2.502 | 1.213<br>(.913)   | 3.365 | -.596<br>(1.132) | .551  | -.587<br>(1.137) | .556  |
| <i>Father's Education Level</i>  |                   |       |                   |       |                  |       |                  |       |
| Associate's Degree               | -1.348<br>(1.269) | .260  | -1.803<br>(1.362) | .165  | 1.289<br>(1.108) | 3.629 | 1.291<br>(1.107) | 3.637 |
| Bachelor's Degree or Higher      | 1.204<br>(.721)   | 3.333 | .716<br>(.800)    | 2.046 | -.649<br>(.722)  | .522  | -.636<br>(.737)  | .529  |
| <i>Partner's Education Level</i> |                   |       |                   |       |                  |       |                  |       |
| Associate's Degree               | -0.164<br>(.830)  | .849  | -.111<br>(.887)   | .895  | .197<br>(.747)   | 1.218 | .187<br>(.757)   | 1.206 |
| Bachelor's Degree or Higher      | -.859<br>(.720)   | .424  | -.693<br>(.783)   | .500  | .811<br>(.497)   | 2.250 | .808<br>(.499)   | 2.246 |
| Constant                         | 3.278<br>(1.998)  |       | 3.429<br>(2.039)  |       | 1.733<br>(1.930) |       | 1.709<br>(1.948) |       |
| Pseudo R <sup>2</sup>            | .336              |       | .387              |       | .306             |       | .306             |       |

---

**Table S3.** OLS Regression of Fathers' Shares of Childcare During COVID-19 Pandemic.

| Variable                                                                 | <i>Dual-Earner Father</i><br>( <i>N</i> = 191) |                           | <i>Sole Earner Father</i><br>( <i>N</i> = 146) |                           |
|--------------------------------------------------------------------------|------------------------------------------------|---------------------------|------------------------------------------------|---------------------------|
|                                                                          | <i>Model 1</i>                                 | <i>Model 2</i>            | <i>Model 3</i>                                 | <i>Model 4</i>            |
|                                                                          | <i>b</i><br>( <i>se</i> )                      | <i>b</i><br>( <i>se</i> ) | <i>b</i><br>( <i>se</i> )                      | <i>b</i><br>( <i>se</i> ) |
| Father's frequency of remote work                                        | .025<br>(.016)                                 | .026<br>(.016)            | .041*<br>(.019)                                | .039*<br>(.020)           |
| Father's egalitarian gender ideology                                     | .018<br>(.043)                                 | .007<br>(.042)            | -.089<br>(.057)                                | -.096<br>(.058)           |
| Fathers' frequency of remote work X Fathers' egalitarian gender ideology |                                                | .055*<br>(.023)           |                                                | -.017<br>(.025)           |
| <i>Statistical Controls</i>                                              |                                                |                           |                                                |                           |
| Father's frequency of remote work pre-pandemic                           | -.036*<br>(.016)                               | -.037*<br>(.016)          | -.013<br>(.027)                                | -.015<br>(.027)           |
| Father's share of childcare pre-pandemic                                 | .0571***<br>(.066)                             | .570***<br>(.065)         | .580***<br>(.063)                              | .581***<br>(.064)         |
| Used childcare pre-pandemic                                              | .070<br>(.069)                                 | .065<br>(.069)            | -.056<br>(.101)                                | -.050<br>(.102)           |
| <i>Partner's Work Status</i>                                             |                                                |                           |                                                |                           |
| Partner's paid work hours                                                | -.001<br>(.003)                                | -.001<br>(.003)           | ---                                            | ---                       |
| Partner does not work from home                                          | .104<br>(.067)                                 | .089<br>(.066)            | ---                                            | ---                       |
| Partner voluntarily decreased paid work hours                            | .090<br>(.083)                                 | .087<br>(.082)            | ---                                            | ---                       |
| Partner left job voluntarily                                             | ---                                            | ---                       | -.061<br>(.147)                                | -.036<br>(.151)           |
| Partner lost job involuntarily                                           | ---                                            | ---                       | -.028<br>(.102)                                | -.031<br>(.102)           |
| Father's age                                                             | .001<br>(.007)                                 | -.001<br>(.007)           | .000<br>(.008)                                 | -.001<br>(.008)           |
| Partner's age                                                            | -.007<br>(.008)                                | -.006<br>(.008)           | .007<br>(.011)                                 | .008<br>(.011)            |
| Age of youngest child                                                    | .007<br>(.008)                                 | .007<br>(.008)            | .019<br>(.012)                                 | .019<br>(.012)            |
| Number of children in home                                               | .051<br>(.036)                                 | .047<br>(.035)            | -.044<br>(.047)                                | -.051<br>(.049)           |
| Married                                                                  | .098<br>(.114)                                 | .093<br>(.112)            | -.409*<br>(.191)                               | -.399*<br>(.192)          |
| Household income pre-pandemic                                            | .004<br>(.023)                                 | .004<br>(.023)            | -.024<br>(.027)                                | -.023<br>(.027)           |
| <i>Father's Race</i>                                                     |                                                |                           |                                                |                           |
| Black                                                                    | -.262<br>(.194)                                | -.185<br>(.194)           | -.090<br>(.340)                                | -.106<br>(.342)           |
| Other                                                                    | .081<br>(.109)                                 | .105<br>(.108)            | -.037<br>(.192)                                | -.031<br>(.192)           |
| Hispanic/Latino                                                          | .047<br>(.102)                                 | .002<br>(.103)            | .052<br>(.153)                                 | .041<br>(.154)            |
| <i>Partner's Race</i>                                                    |                                                |                           |                                                |                           |
| Black                                                                    | .242<br>(.226)                                 | .159<br>(.225)            | -.150<br>(.403)                                | -.138<br>(.405)           |
| Other                                                                    | .077<br>(.103)                                 | .084<br>(.101)            | -.029<br>(.145)                                | -.038<br>(.146)           |

|                                  |                    |                    |                   |                   |
|----------------------------------|--------------------|--------------------|-------------------|-------------------|
| Hispanic/Latina                  | -.065<br>(.108)    | -.019<br>(.108)    | -.298<br>(.175)   | -.282<br>(.177)   |
| <i>Father's Education Level</i>  |                    |                    |                   |                   |
| Associate's Degree               | -.056<br>(.116)    | -.069<br>(.115)    | .255<br>(.199)    | .268<br>(.200)    |
| Bachelor's Degree or Higher      | -.072<br>(.093)    | -.120<br>(.094)    | .259*<br>(.122)   | .279*<br>(.126)   |
| <i>Partner's Education Level</i> |                    |                    |                   |                   |
| Associate's Degree               | -.099<br>(.114)    | -.084<br>(.113)    | .028<br>(.127)    | .012<br>(.129)    |
| Bachelor's Degree or Higher      | -.078<br>(.091)    | -.052<br>(.091)    | -.089<br>(.089)   | -.095<br>(.089)   |
| Constant                         | 1.090***<br>(.269) | 1.139***<br>(.266) | 1.088**<br>(.353) | 1.055**<br>(.357) |
| R <sup>2</sup>                   | .274               | .295               | .497              | .495              |

---

\*=p <.05 \*\*=p<.001 \*\*\*=p<.001.
